# Supplementary material for: Epilepsy enhance global efficiency of language networks in right temporal lobe gliomas
Source: PubMed Central journal article supplement (PMC7871790; doi:10.1111/cns.13595), 2021-01-19
Supplement: CNS-27-363-s001.pdf [file CNS-27-363-s001.pdf]

**Epilepsy-related brain network alterations in patients with temporal lobe glioma in the right hemisphere**

|                               |                                                                                                                                                   |
|-------------------------------|---------------------------------------------------------------------------------------------------------------------------------------------------|
| Journal:                      | <i>CNS Neuroscience &amp; Therapeutics</i>                                                                                                        |
| Manuscript ID                 | CNSNT-2020-557.R1                                                                                                                                 |
| Wiley - Manuscript type:      | Original Article                                                                                                                                  |
| Date Submitted by the Author: | 16-Dec-2020                                                                                                                                       |
| Complete List of Authors:     | Fang, Shengyu; Beijing Neurosurgical Institute<br>Wang, Yinyan; Beijing Neurosurgical Institution<br>Jiang, Tao; Beijing Neurosurgical Institute, |
| Keywords:                     | glioma, epilepsy, magnetic resonance imaging, neural networks                                                                                     |
| Scope of Manuscript:          | brain tumor, Cerebral cortex, Epilepsy, Glioma                                                                                                    |
|                               |                                                                                                                                                   |

1  
2  
3 **1 Title: Epilepsy-related brain network alterations in patients with**  
4  
5  
6 **2 temporal lobe glioma in the right hemisphere**  
7

8  
9 **3 Running Title:** Glioma-related epilepsy alters neural networks

10  
11 **4 Author list:**

12  
13 *Shengyu Fang, MD<sup>1, 2</sup>; Yinyan Wang, MD<sup>1, 2, †</sup>; Tao Jiang, MD, PhD<sup>1, 2, 3, †</sup>*  
14

15  
16 <sup>1</sup> Beijing Neurosurgical Institute, Beijing, China;

17  
18 <sup>2</sup> Department of Neurosurgery, Beijing Tiantan Hospital, Capital Medical University,  
19  
20 Beijing, China;

21  
22 <sup>3</sup> Research Unit of Accurate Diagnosis, Treatment, and Translational Medicine of Brain  
23  
24 Tumors Chinese Academy of Medical Sciences  
25

26  
27 **† Co-corresponding Authors:**

28  
29 1. Tao Jiang, MD, PhD

30  
31 Department of Neurosurgery, Beijing Tiantan Hospital, Capital Medical University,  
32  
33 119, the Western Road of the Southern 4<sup>th</sup> Ring Road, Beijing, China.

34  
35 Postal code: 100070

36  
37 Tel/Fax: +86-01059976689.

38  
39 E-mail: [taojiang1964@163.com](mailto:taojiang1964@163.com)  
40  
41

42  
43 2. Yinyan Wang, MD

44  
45 Department of Neurosurgery, Beijing Tiantan Hospital, Capital Medical University,  
46  
47 119, the Western Road of the Southern 4<sup>th</sup> Ring Road, Beijing, China.

48  
49 Postal code: 100070

50  
51 Tel/Fax: +86-01059976686.

52  
53 E-mail: [tiantanyinyan@126.com](mailto:tiantanyinyan@126.com)  
54  
55

56  
57 **24 Author Contributions:**

58  
59 Study concept and design: SF, YW, and TJ.  
60

- 1 Data acquisition and analysis: SF and YW.
- 2 Statistics/verified analytical method: SF and YW.
- 3 Writing the first draft: SF and YW.
- 4 Supervision study: YW and TJ.
- 5 Read and approved final version: All authors.

1  
2  
3 **Abstract**  
4

5  
6 **Aims:** We analyzed the resting-state functional magnetic resonance images to  
7  
8 investigate the alterations of neural networks in patients with glioma-related epilepsy  
9  
10 (GRE).  
11

12  
13 **Methods:** Fifty-six patients with right temporal lower-grade glioma were divided into  
14  
15 GRE (n = 28) and non-GRE groups. Twenty-eight healthy subjects were recruited after  
16  
17 matching age, sex, and education level. Sensorimotor, visual, language, and left  
18  
19 executive control networks were applied to generate functional connectivity matrices,  
20  
21 and their topological properties were investigated.  
22

23  
24 **Results:** No significant alterations in functional connectivity were found. The least  
25  
26 significant discovery test revealed differences only in the language network. The  
27  
28 shortest path length, clustering coefficient, local efficiency, and vulnerability were  
29  
30 greater in the non-GRE group than in the other groups. The nodal efficiencies of two  
31  
32 nodes (mirror areas to Broca and Wernicke) were weaker in the non-GRE group than  
33  
34 in the other groups. The node of degree centrality (Broca), nodal local efficiency  
35  
36 (Wernicke), and nodal clustering coefficient (temporal polar) were greater in the non-  
37  
38 GRE group than in the healthy group.  
39  
40

41  
42 **Conclusion:** Different tumor locations alter different neural networks. Temporal-lobe  
43  
44 gliomas in the right hemisphere altered the language network. Glioma itself and GRE  
45  
46 altered the network in opposing ways in patients with right-temporal glioma.  
47  
48  
49

50  
51  
52 **Keywords:** glioma, epilepsy, magnetic resonance imaging, neural networks  
53  
54  
55  
56  
57  
58  
59  
60

## 1 **Introduction**

2 Glioma-related epilepsy (GRE) is a common symptom in patients with diffuse  
3 lower-grade glioma (DLGG, World Health Organization grades 2 and 3), [1, 2]  
4 especially in cases involving gliomas growing in the frontal or temporal lobes.[3]  
5 Primary seizures are thought as a network-related disorder. The correlations between  
6 alterations in functional networks and epilepsy have been reported.[4, 5] However,  
7 alterations in functional networks in patients with GRE remain poorly understood.

8 The resting-state functional magnetic resonance imaging (rs-fMRI) acquires  
9 oxyhemoglobin signals when patients are in a resting state. The synchronization of the  
10 oxyhemoglobin signals between the two brain regions is used to delineate functional  
11 connectivity. Graph theoretical analysis is a quantitative measurement that reflects  
12 connective model of functional network and the ability to convey information.[6, 7] In  
13 previous studies, the disruption of functional connectivity (FC) and weakening of  
14 network efficiency were induced via primary temporal-lobe seizures, as primary  
15 seizures reduce the synchronous fluctuations between different cortices.[6, 8, 9]  
16 Nevertheless, changes in neural networks were caused by both the glioma and GRE.  
17 Hence, previous conclusions based on primary seizures are not applicable in patients  
18 with glioma and may occlude appropriate preoperative prevention and intraoperative  
19 treatment. Although left-temporal gliomas were found to activate visual networks and  
20 GRE to inhibit visual networks,[10] it remains unknown whether right-temporal  
21 gliomas and GRE cause the same changes. Consequently, further investigation of how  
22 the glioma in right temporal lobe and GRE impact neural networks is important to  
23 optimize strategies of preoperative seizure control and intraoperative treatment.

24 To bridge this knowledge gap, the patients with right temporal DLGG and healthy  
25 subjects were retrospectively recruited to investigate how the neural networks were

1 altered by the right-temporal glioma and GRE.

## 2 **Methods**

3 This study was approved by the institutional review board of Beijing Tiantan  
4 Hospital and performed in accordance with the ethical standards put forth in the  
5 Declaration of Helsinki. All participants provided informed written consent before data  
6 acquisition.

### 7 *Participants*

8 The records of patients aged > 18 years who underwent surgical treatment at the  
9 glioma treatment center of Beijing Tiantan Hospital between July 2017 and September  
10 2020 were reviewed. The inclusion criteria were as follows: a) no history of brain  
11 disease, b) majority of glioma located on the right temporal hemisphere, c)  
12 histopathological diagnosis of primary DLGG according to the histopathological  
13 criteria (2016, World Health Organization, [11]) and d) only taking levetiracetam 0.5 g  
14 twice a day to control GRE once diagnosed as glioma. The exclusion criteria were as  
15 follows: a) head motion greater than 1 mm in translation or 1° in rotation, b) glioma  
16 invading the bilateral hemisphere, c) a period of levetiracetam administration exceeding  
17 30 days, and d) contraindications for MRI.

### 18 *Clinical characteristics*

19 The information on age, sex, education time, Karnofsky performance score, extent  
20 of tumor resection, histopathology, isocitrate dehydrogenase mutation and chromosome  
21 1p/19q co-deletion, history of preoperative seizures, and performances during seizure  
22 onset were acquired from inpatient records. Follow-up information was obtained by  
23 telephone interviews at 6 months after tumor resections.

### 24 *MRI acquisition*

25 We used a 3-T MR scanner (MAGNETOM Prisma, Siemens, Erlangen, Germany)

1 to acquire MR data. The T2 sequence with fluid-attenuated inversion recovery (FLAIR)  
2 (echo time [TE], 87 ms; repetition time [TR], 3200 ms; field of view [FOV], 220 mm  
3 \* 220 mm; fractional anisotropy [FA], 150°; voxel size, 0.9 mm \* 0.9 mm \* 5 mm; slice  
4 number, 25). Moreover, we used rs-fMRI sequence to acquire functional image data  
5 (TE, 30 ms; TR, 2000 ms; FOV, 220 mm \* 220 mm; FA, 75°; voxel size, 3.0 mm \* 3.0  
6 mm \* 5.0 mm; slice number, 30; and acquisition time, 8 min.

7 All patients were scanned within 3 days before surgery.

### 8 ***Pipeline of rs-MRI preprocessing***

9 A software, Graph Theoretical Network Analysis  
10 (<https://www.nitrc.org/projects/gretna>), [12, 13] was used to process rs-fMRI data. The  
11 pipeline was the same as in the previous study[10] and is shown in the supplementary  
12 materials.

### 13 ***Regions of tumor invasion***

14 Each glioma was segmented in its individual space based on the region with hyper-  
15 intensity in T2-FLAIR images. The extent of glioma infiltration was manually and  
16 independently determined by two neuroradiologists. If the determined regions varied  
17 more than 5%, the final decision was made by a third neuroradiologist who had over 20  
18 years' clinical experience. Subsequently, all tumor masks were normalized into the  
19 standard space of the Montreal Neurological Institute template by using SPM8 software  
20 (<http://www.fil.ion.ucl.ac.uk/spm/software/spm8>).

### 21 ***Regions of interest***

22 Regions of interest (ROIs) were generated from “brainnetome atlas”  
23 (<http://www.brainnetome.org/>). [14] This open-access atlas comprises 246 brain regions,  
24 to acquire matrices of FC. Four sub-templates were extracted, which were sensorimotor,  
25 language, left executive control, and visual networks. The ROIs in these networks

1 invaded by glioma were excluded. Hence, the inaccurate effect of registration was  
2 reduced as much as possible. Detailed information on each ROI is presented in Tables  
3 S1 to S4.

#### 4 ***Network construction***

5 The mean time series between each two ROIs were compared using Pearson  
6 correlation, and subsequently the FC matrices were constructed. Consequently, we  
7 obtained four different FC matrices.

#### 8 ***Graph theoretical measurement***

9 Topological properties of the four sub-networks were analyzed using graph theory  
10 measurement, which included global properties (the shortest path length, global  
11 efficiency, local efficiency, clustering coefficient, transitivity, and vulnerability), nodal  
12 properties (nodal efficiency, nodal local efficiency, nodal clustering coefficient, degree  
13 centrality), and small-worldness. [10, 15, 16] The details of properties were shown in  
14 part 2 of the supplementary materials. All matrices were absolutized and binarized to  
15 further analyze the topological properties.

#### 16 ***Statistical analyses***

17 Epidemiology characteristics were compared among the GRE, non-GRE, and  
18 healthy groups by using Student's *t*-test, Mann-Whitney U test, Chi-squared test,  
19 Fisher's exact test, and one-way analysis of variance (one-way ANOVA) based on  
20 categories of data. All data were tested to ensure whether they were normal/Gaussian  
21 distribution. If a group of data did not exhibit a normal distribution, a student's *t* test or  
22 one-way ANOVA test was applied with a non-parametric equivalent.

23 The differences in FC of the four sub-networks were generated from comparisons  
24 between the patient and healthy groups using Student's *t*-test. Moreover, false discovery  
25 rate (FDR) was applied to correct the generated results. To found differences in



1 topological properties, we used a series of sparsity thresholds (from 0.17 to 0.33,  
2 interval 0.01) consistent with a previously study.[4] For each subject, topological  
3 properties were generated according to sparsity. Each property was first analyzed using  
4 one-way ANOVA test. Subsequently, post-hoc pairwise comparisons were performed  
5 on the generated results in global and nodal properties with least significant difference  
6 (LSD) test. A significant p-value was lower than 0.05.

### 7 **Data availability statement**

8 Anonymized data will be made available on request.

## 9 **Results**

### 10 *Demographic characteristics*

11 Fifty-six patients met the inclusion criteria, and four patients were excluded, as  
12 their periods of anti-epileptic drug use were longer than 30 days. According to the  
13 history of preoperative GRE onset, 28 patients were divided into the GRE group (male,  
14 n = 11) and the others into the non-GRE group (male, n = 14, Table 1). All patients  
15 were right-handed according to the assessments by the Edinburgh Handedness  
16 Inventory test, and their epilepsy onset performance was considered as a secondary  
17 generalized epilepsy. Our postoperative follow-up showed that, all patients achieved  
18 Engel class I at 6 months after tumor resection. Based on the sample size of each group,  
19 28 healthy participants were finally recruited after matching age, sex, and education  
20 level (14 males; all right-handed).

21 No differences in Karnofsky performance score ( $p = 0.12$ , Mann-Whitney U test),  
22 ratio of histopathology ( $p = 0.73$ ), isocitrate dehydrogenase mutation ( $p = 0.59$ , Chi-  
23 squared test), or chromosome 1p/19q co-deletion ( $p = 0.53$ , Chi-squared test) were  
24 observed between the GRE and non-GRE groups. Moreover, no difference in tumor  
25 volume ( $p = 0.75$ ) was found between the GRE ( $52.38 \pm 7.06$  mL) and non-GRE groups

1  
2  
3 1 (49.65 ± 4.98 mL).  
4

5  
6 2 ***Functional connectivity differences***  
7

8 3 Our results revealed no differences in FC of the four sub-networks (sensorimotor,  
9  
10 4 visual, language, and left executive control networks) among the three groups after FDR  
11  
12 5 correction.  
13

14  
15 6 ***Differences in global topological properties***  
16

17 7 In the language network, the clustering coefficient ( $p = 0.0070$ ), global efficiency  
18  
19 8 ( $p < 0.0001$ ), local efficiency ( $p = 0.0045$ ), shortest path length ( $p < 0.0001$ ), transitivity  
20  
21 9 ( $p = 0.0002$ ), and vulnerability ( $p = 0.0499$ ) were different among the three groups, as  
22  
23 10 determined using one-way ANOVA (Table S5).  
24  
25

26 11 Post-hoc analysis with the LSD test (Fig. 1) revealed that the non-GRE group  
27  
28 12 exhibited weaker global efficiency ( $0.502 \pm 0.005$ ) than the GRE ( $0.522 \pm 0.003$ ,  $p <$   
29  
30 13  $0.0001$ ) and control groups ( $0.525 \pm 0.002$ ,  $p < 0.0001$ ). Moreover, the non-GRE group  
31  
32 14 showed greater local efficiency ( $0.465 \pm 0.012$ ) than the GRE ( $0.430 \pm 0.010$ ,  $p =$   
33  
34 15  $0.0016$ ) and control groups ( $0.437 \pm 0.010$ ,  $p = 0.0165$ ). The non-GRE group exhibited  
35  
36 16 a longer shortest path length ( $2.089 \pm 0.015$ ) than the GRE ( $2.023 \pm 0.008$ ,  $p < 0.0001$ )  
37  
38 17 and control groups ( $2.015 \pm 0.006$ ,  $p < 0.0001$ ). Furthermore, the non-GRE group  
39  
40 18 showed a greater clustering coefficient ( $0.577 \pm 0.002$ ) than the GRE ( $0.325 \pm 0.010$ ,  $p$   
41  
42 19  $= 0.0020$ ) and control groups ( $0.334 \pm 0.009$ ,  $p = 0.0348$ ). No differences in global  
43  
44 20 efficiency ( $p = 0.5939$ ), local efficiency ( $p = 0.4157$ ), shortest path length ( $p = 0.6025$ ),  
45  
46 21 or clustering coefficient ( $p = 0.9079$ ) were found between the GRE and control groups.  
47  
48  
49

50  
51 22 Post-hoc analysis using the LSD test (Fig. 2) revealed that the non-GRE group had  
52  
53 23 greater transitivity ( $0.372 \pm 0.015$ ) than the GRE ( $0.316 \pm 0.009$ ,  $p = 0.0011$ ) and  
54  
55 24 control groups ( $0.315 \pm 0.007$ ,  $p = 0.0009$ ). Moreover, the non-GRE group had more  
56  
57 25 severe vulnerability ( $0.071 \pm 0.005$ ) than the GRE ( $0.060 \pm 0.003$ ,  $p = 0.0371$ ) and  
58  
59  
60

1 control groups ( $0.060 \pm 0.003$ ,  $p = 0.0371$ ). No differences in transitivity ( $p = 0.9524$ )  
2 or vulnerability ( $p = 0.9999$ ) were found between the GRE and control groups.

3 No differences in global topological properties were found in the other three sub-  
4 networks (sensorimotor, visual, and left executive networks).

### 5 ***Differences in small-worldness properties***

6 In the language network, the value of lambda ( $p < 0.0001$ ) differed among the  
7 groups, as determined using one-way ANOVA (Table S5 and Fig. 3). No differences in  
8 the values of gamma ( $p = 0.4822$ ) or sigma ( $p = 0.5176$ ) were found among the three  
9 groups. Post-hoc analysis using the LSD test showed that the non-GRE group exhibited  
10 a higher value of lambda ( $1.043 \pm 0.006$ ) than the GRE ( $1.016 \pm 0.003$ ,  $p < 0.0001$ ) and  
11 control groups ( $1.014 \pm 0.002$ ,  $p < 0.0001$ ). No difference in the value of lambda ( $p =$   
12  $0.5969$ ) was found between the GRE and control groups.

13 No significant alterations in small-worldness (gamma, lambda, and sigma) in the  
14 other three sub-networks (sensorimotor, visual, and left executive networks) were  
15 found among the three groups.

### 16 ***Differences in nodal topological properties***

17 One-way ANOVA revealed two nodes in the right hemisphere that had differing  
18 nodal efficiencies among the three groups in the language network (Table S6 and Fig.  
19 4): rostroventral BA 39 (A39rv\_R,  $p = 0.0002$ ) and rostral BA 45 (A45r\_R,  $p = 0.0060$ ).  
20 Regarding A39rv\_R, the non-GRE group had weaker nodal efficiency ( $0.483 \pm 0.019$ )  
21 than the GRE ( $0.558 \pm 0.012$ ,  $p = 0.0014$ ) and control groups ( $0.560 \pm 0.012$ ,  $p = 0.0010$ )  
22 after post-hoc analysis. Similarly, regarding A45r\_R, the non-GRE group showed  
23 weaker nodal efficiency ( $0.467 \pm 0.017$ ) than the GRE ( $0.520 \pm 0.008$ ,  $p = 0.0207$ ) and  
24 control groups ( $0.523 \pm 0.013$ ,  $p = 0.0129$ ) after post-hoc analysis. No differences in  
25 nodal efficiency of these two nodes were found between the GRE and control groups

1 (A39rv\_R,  $p = 0.8903$  and A45r\_R,  $p = 0.8693$ ).

2       Among the three groups, some differences in nodal local efficiency, degree  
3 centrality, and nodal clustering coefficient were found in caudal BA 40 (A40c\_L,  $p =$   
4  $0.0061$ ), ventral BA 44 (A44v\_L,  $p = 0.0007$ ), and rostral BA 22 (A22r\_L,  $p = 0.0097$ )  
5 in the left hemisphere, as determined using one-way ANOVA (Tables S7–S9 and Fig.  
6 5). Regarding A40c\_L, the GRE group exhibited weaker nodal local efficiency ( $0.301$   
7  $\pm 0.032$ ) than the non-GRE ( $0.455 \pm 0.039$ ,  $p = 0.0102$ ) and control groups ( $0.437 \pm$   
8  $0.037$ ,  $p = 0.0280$ ) after post-hoc analysis. Regarding A44v\_L, the non-GRE group  
9 exhibited greater degree centrality ( $5.821 \pm 0.349$ ) than the GRE ( $4.750 \pm 0.250$ ,  $p =$   
10  $0.0282$ ) and control groups ( $4.071 \pm 0.262$ ,  $p = 0.0005$ ) after post-hoc analysis. With  
11 regard to A22r\_L, the non-GRE group exhibited a greater nodal clustering coefficient  
12 ( $0.386 \pm 0.048$ ) than the GRE ( $0.229 \pm 0.037$ ,  $p = 0.0150$ ) and control groups ( $0.250 \pm$   
13  $0.027$ ,  $p = 0.0433$ ) after post-hoc analysis.

14       No significant alterations in nodal topological properties in the other three sub-  
15 networks (sensorimotor, visual, and left executive networks) were found among the  
16 three groups.

## 17 **Discussion**

18       In this study, we investigated alterations in functional neural networks induced by  
19 right temporal GRE. Our findings indicated that GRE and right-temporal DLGGs  
20 resulted in altered language networks. Although the altered network differed from the  
21 left-temporal GRE change (visual network), the trend of right-temporal DLGGs and  
22 GRE-induced functional network change was the same as that of the left. That is, the  
23 GRE-induced functional network change was found to be opposite of that induced by  
24 DLGG.

25       Global efficiency and shortest path length reflect the ability and cost of conveying

1  
2  
3 1 information, respectively.[17] In our findings, right-temporal glioma decreased global  
4  
5 2 efficiency and increased the shortest path length of the language network in the non-  
6  
7 3 GRE group. These changes were related to a neural pathway disruption caused by  
8  
9 4 glioma infiltration. Indeed, the main language network is located in the left hemisphere  
10  
11 5 in right-handed people.[18] The fMRI results suggested that when the left language  
12  
13 6 network was damaged, functional compensation occurred in the cortex of the right  
14  
15 7 hemisphere corresponding to the left language regions.[19] These findings indicate that  
16  
17 8 parts of the language network are located on the right and cooperated with the left  
18  
19 9 network to accomplish language tasks.[20, 21] Consequently, if the right-sided language  
20  
21 10 network was damaged by glioma, the global efficiency of the whole language network  
22  
23 11 was decreased in the non-GRE group. Indeed, compared with the GRE and healthy  
24  
25 12 groups, the clustering coefficient and local efficiency in the non-GRE group was  
26  
27 13 increased. These alterations reflect the increase in the number of functional connections,  
28  
29 14 but this does not mean that the pathway between two nodes was shortened or the ability  
30  
31 15 to convey information was increased. Moreover, the right-temporal glioma failed to  
32  
33 16 disrupt the main language network (left hemisphere) and was unable to further induce  
34  
35 17 language deficits. Hence, the language network did not drastically reorganize in the  
36  
37 18 non-GRE group. Therefore, we infer that the global decline in the efficiency of the  
38  
39 19 language network was the result of the damage caused by glioma, which increased the  
40  
41 20 burden of the residual language network.

42  
43  
44  
45  
46  
47  
48  
49 21 However, in the GRE group, global efficiency did not differ from that in the healthy  
50  
51 22 group. Why was there no decrease in global efficiency in the GRE group? These  
52  
53 23 alterations were associated with GRE-induced network reorganization, but they did not  
54  
55 24 indicate that GRE facilitated recovery of the language network. Unlike primary epilepsy  
56  
57 25 with a long and frequent onset history, the period from onset of GRE to glioma  
58  
59  
60

1  
2  
3 1 diagnosis and tumor resection is short. Hence, cortical sclerosis,[\[22\]](#) gray-matter  
4  
5 2 atrophy,[\[23\]](#) and cortical hypo-metabolism[\[24\]](#) did not occur in patients with GRE.  
6  
7  
8 3 Conversely, we found that the path length in the GRE group was shorter than that in the  
9  
10 4 non-GRE group. The GRE shortens pathways to decrease system response time, which  
11  
12 5 facilitates the rapid spread of local epileptic discharges.[\[25, 26\]](#) Thus, we concluded  
13  
14 6 that the mechanism of GRE altering the language network was as follows: the right-  
15  
16 7 temporal glioma first disrupted the right-sided language network and decreased global  
17  
18 8 efficiency; then, accompanied by the GRE, the residual network was reorganized with  
19  
20 9 increased global efficiency.  
21  
22

23  
24 10 Vulnerability represents the degree of global efficiency alteration when a node is  
25  
26 11 replaced and reflects whether a neural network is stable.[\[27\]](#) We observed that the  
27  
28 12 vulnerability in the non-GRE group was higher than that in the GRE and control groups.  
29  
30 13 This finding indicated that the right-temporal glioma rendered the residual language  
31  
32 14 network vulnerable, and to maintain the residual language function normally, none of  
33  
34 15 the nodes could be further broken or replaced. Simultaneously, this finding verified that  
35  
36 16 GRE facilitated network reorganization to regain stability.  
37  
38

39  
40 17 Similar results were found for nodal properties. The decreasing nodal efficiency of  
41  
42 18 the right inferior frontal and supramarginal gyri in the non-GRE group showed that the  
43  
44 19 glioma damaged the original right language network and affected the two important  
45  
46 20 nodes needed to process language information. Simultaneously, the left nodes in the  
47  
48 21 language network had to increase the degree centrality (Broca area), nodal local  
49  
50 22 efficiency (Wernicke area), and nodal clustering coefficient (in the left temporal lobe)  
51  
52 23 to maintain language functions. However, influenced by both glioma and GRE, the  
53  
54 24 alterations in these nodal properties were alleviated in the GRE group.  
55  
56  
57

58 25 Gliomas located in different hemispheres will affect different neural networks, but  
59  
60

1 the GRE and glioma itself induced the same network alterations. Based on our findings,  
2 the right-temporal glioma and GRE affected the language network rather than the visual  
3 network, which was shown to be affected by left-temporal glioma and GRE in a  
4 previous study. [10] We thought that the different affected networks were related to the  
5 dominant hemisphere. When glioma is located in the left hemisphere, the main language  
6 network is damaged and residual language network reorganization occurs, whether  
7 caused by the glioma itself or GRE. Hence, no differences in language network  
8 alterations were found between the GRE and non-GRE groups in the previous study.  
9 Regarding the right-temporal glioma, the main language network was not affected.  
10 Therefore, the alterations in the language network caused by the glioma itself and the  
11 GRE were significantly different. A common trend is that the changes in the neural  
12 networks caused by glioma itself or GRE are converse, regardless whether the tumor is  
13 located on the left or right hemisphere.

#### 14 **Limitations**

15 The phenomenon that levetiracetam normalized FC was found in patients with  
16 primary epilepsy who took levetiracetam over 3 months.[28] In our GRE group, all  
17 patients indeed took levetiracetam, but the period of administration was short (not  
18 longer than 15 days). To our knowledge, no study has revealed whether taking  
19 levetiracetam in a short period would alter topological properties. Hence, we could not  
20 determine whether alterations of topological properties in patients with GRE tended to  
21 normalize due to levetiracetam administration. In the future, we will enroll relevant  
22 patients to investigate whether taking levetiracetam for a short period can induce  
23 alterations of the functional network in patients with GRE and validate the findings in  
24 this study.

## 1 **Conclusions**

2 Different tumor locations alter different neural networks. Temporal-lobe gliomas  
3 in the right hemisphere altered the language network. Alterations in the language  
4 network caused by GRE were opposite to those caused by glioma itself. Our findings  
5 provide a novel insight into the GRE impact and improve our understanding of  
6 alterations in functional neural networks in patients with glioma. In addition, under the  
7 premise of protecting the language function, postoperative epileptic onset might be  
8 effectively controlled by electrical cauterizing the pia mater in the language network in  
9 patients with GRE.

## 10 **Acknowledgments**

11 Thanks to Dr. Meng Lanxi for imaging data acquisition.

## 12 **Disclosure**

13 All authors do not have any conflict of interest.

## 14 **Funding information**

15 This study was supported by funds from the Public Welfare Development and  
16 Reform Pilot Project of Beijing Medical Research Institute  
17 (PXM2019\_026280\_000008), Beijing Municipal Natural Science Foundation (No.  
18 7202021), National Natural Science Foundation of China (No. 82001777), National  
19 Key Research and Development Program of China (2018YFC0115604), and Brain  
20 Tumor Precision Diagnosis and Treatment and Translational Medicine Innovation Unit,  
21 Chinese Academy of Medical Sciences (2019-I2M-5-021).

22



## 1 References

- 2 1. Liang S, Fan X, Zhao M, Shan X, Li W, Ding P, et al. Clinical practice guidelines  
3 for the diagnosis and treatment of adult diffuse glioma-related epilepsy. *Cancer Med.*  
4 2019 Aug;8(10):4527-35.
- 5 2. Li Y, Shan X, Wu Z, Wang Y, Ling M, Fan X. IDH1 mutation is associated with a  
6 higher preoperative seizure incidence in low-grade glioma: A systematic review and  
7 meta-analysis. *Seizure.* 2018 Feb;55:76-82.
- 8 3. Shan X, Fan X, Liu X, Zhao Z, Wang Y, Jiang T. Clinical characteristics associated  
9 with postoperative seizure control in adult low-grade gliomas: a systematic review and  
10 meta-analysis. *Neuro-oncology.* 2018 Feb 19;20(3):324-31.
- 11 4. Ji GJ, Yu Y, Miao HH, Wang ZJ, Tang YL, Liao W. Decreased Network Efficiency  
12 in Benign Epilepsy with Centrottemporal Spikes. *Radiology.* 2017 Apr;283(1):186-94.
- 13 5. Li Q, Chen Y, Wei Y, Chen S, Ma L, He Z, et al. Functional Network Connectivity  
14 Patterns between Idiopathic Generalized Epilepsy with Myoclonic and Absence  
15 Seizures. *Front Comput Neurosci.* 2017;11:38.
- 16 6. Bernhardt BC, Chen Z, He Y, Evans AC, Bernasconi N. Graph-theoretical analysis  
17 reveals disrupted small-world organization of cortical thickness correlation networks in  
18 temporal lobe epilepsy. *Cereb Cortex.* 2011 Sep;21(9):2147-57.
- 19 7. He Y, Wang J, Wang L, Chen ZJ, Yan C, Yang H, et al. Uncovering intrinsic  
20 modular organization of spontaneous brain activity in humans. *PLoS One.*  
21 2009;4(4):e5226.
- 22 8. Englot DJ, Hinkley LB, Kort NS, Imber BS, Mizuiri D, Honma SM, et al. Global  
23 and regional functional connectivity maps of neural oscillations in focal epilepsy. *Brain.*  
24 2015 Aug;138(Pt 8):2249-62.
- 25 9. Englot DJ, Gonzalez HFJ, Reynolds BB, Konrad PE, Jacobs ML, Gore JC, et al.  
26 Relating structural and functional brainstem connectivity to disease measures in  
27 epilepsy. *Neurology.* 2018 Jul 3;91(1):e67-e77.
- 28 10. Fang S, Zhou C, Fan X, Jiang T, Wang Y. Epilepsy-Related Brain Network  
29 Alterations in Patients With Temporal Lobe Glioma in the Left Hemisphere. *Front*  
30 *Neurol.* 2020;11:684.
- 31 11. Louis DN, Perry A, Reifenberger G, von Deimling A, Figarella-Branger D,  
32 Cavenee WK, et al. The 2016 World Health Organization Classification of Tumors of  
33 the Central Nervous System: a summary. *Acta Neuropathol.* 2016 Jun;131(6):803-20.
- 34 12. Wang J, Wang X, Xia M, Liao X, Evans A, He Y. Corrigendum: GRETNA: a graph  
35 theoretical network analysis toolbox for imaging connectomics. *Front Hum Neurosci.*  
36 2015;9:458.
- 37 13. Wang J, Wang X, Xia M, Liao X, Evans A, He Y. GRETNA: a graph theoretical  
38 network analysis toolbox for imaging connectomics. *Front Hum Neurosci.* 2015;9:386.
- 39 14. Fan L, Li H, Zhuo J, Zhang Y, Wang J, Chen L, et al. The Human Brainnetome  
40 Atlas: A New Brain Atlas Based on Connectional Architecture. *Cereb Cortex.* 2016  
41 Aug;26(8):3508-26.
- 42 15. Qi S, Mu YF, Cui LB, Zhang J, Guo F, Tan QR, et al. Anomalous gray matter  
43 structural networks in recent onset post-traumatic stress disorder. *Brain Imaging Behav.*  
44 2018 Apr;12(2):390-401.
- 45 16. Caeyenberghs K, Powell HW, Thomas RH, Brindley L, Church C, Evans J, et al.  
46 Hyperconnectivity in juvenile myoclonic epilepsy: a network analysis. *Neuroimage*  
47 *Clin.* 2015;7:98-104.
- 48 17. Zhao T, Cao M, Niu H, Zuo XN, Evans A, He Y, et al. Age-related changes in the  
49 topological organization of the white matter structural connectome across the human

- 1 lifespan. *Hum Brain Mapp.* 2015 Oct;36(10):3777-92.
- 2 18. Kundu B, Rolston JD, Grandhi R. Mapping language dominance through the lens  
3 of the Wada test. *Neurosurg Focus.* 2019 Sep 1;47(3):E5.
- 4 19. Deng X, Zhang Y, Xu L, Wang B, Wang S, Wu J, et al. Comparison of language  
5 cortex reorganization patterns between cerebral arteriovenous malformations and  
6 gliomas: a functional MRI study. *J Neurosurg.* 2015 May;122(5):996-1003.
- 7 20. Gebska-Kosla K, Bryszewski B, Jaskolski DJ, Fortuniak J, Niewodniczy M,  
8 Stefanczyk L, et al. Reorganization of language centers in patients with brain tumors  
9 located in eloquent speech areas - A pre- and postoperative preliminary fMRI study.  
10 *Neurol Neurochir Pol.* 2017 Sep - Oct;51(5):403-10.
- 11 21. Gunal V, Savardekar AR, Devi BI, Bharath RD. Preoperative functional magnetic  
12 resonance imaging in patients undergoing surgery for tumors around left (dominant)  
13 inferior frontal gyrus region. *Surg Neurol Int.* 2018;9:126.
- 14 22. Aparicio J, Carreno M, Bargallo N, Setoain X, Rubi S, Rumia J, et al. Combined  
15 (18)F-FDG-PET and diffusion tensor imaging in mesial temporal lobe epilepsy with  
16 hippocampal sclerosis. *Neuroimage Clin.* 2016;12:976-89.
- 17 23. Caciagli L, Bernasconi A, Wiebe S, Koepp MJ, Bernasconi N, Bernhardt BC. A  
18 meta-analysis on progressive atrophy in intractable temporal lobe epilepsy: Time is  
19 brain? *Neurology.* 2017 Aug 1;89(5):506-16.
- 20 24. Celiker Uslu S, Yuksel B, Tekin B, Sariahmetoglu H, Atakli D. Cognitive  
21 impairment and drug responsiveness in mesial temporal lobe epilepsy. *Epilepsy Behav.*  
22 2019 Jan;90:162-7.
- 23 25. Ponten SC, Bartolomei F, Stam CJ. Small-world networks and epilepsy: graph  
24 theoretical analysis of intracerebrally recorded mesial temporal lobe seizures. *Clin*  
25 *Neurophysiol.* 2007 Apr;118(4):918-27.
- 26 26. Dyhrfeld-Johnsen J, Santhakumar V, Morgan RJ, Huerta R, Tsimring L, Soltesz  
27 I. Topological determinants of epileptogenesis in large-scale structural and functional  
28 models of the dentate gyrus derived from experimental data. *J Neurophysiol.* 2007  
29 Feb;97(2):1566-87.
- 30 27. Latora V, Marchiori M. Vulnerability and protection of infrastructure networks.  
31 *Phys Rev E Stat Nonlin Soft Matter Phys.* 2005 Jan;71(1 Pt 2):015103.
- 32 28. Pang XM, Liang XL, Zhou X, Liu JP, Zhang Z, Zheng JO. Alterations in intra- and  
33 internetwork functional connectivity associated with levetiracetam treatment in  
34 temporal lobe epilepsy. *Neurol Sci.* 2020 Mar 9.

**Table 1****Table 1. Demographic and Clinical Characteristics of patient groups**

| Demographic and Clinical Characteristics | GRE (n = 28) | non-GRE (n = 28) | Healthy (n = 28) | p value |
|------------------------------------------|--------------|------------------|------------------|---------|
| <b>Gender</b>                            |              |                  |                  |         |
| Male                                     | 11           | 14               | 14               | 0.65    |
| Female                                   | 17           | 14               | 14               |         |
| <b>Age (y) *</b>                         | 41.4 ± 2.3   | 46.0 ± 2.2       | 39.7 ± 1.7       | 0.09    |
| <b>Handness</b>                          |              |                  |                  |         |
| Right                                    | 28           | 28               | 28               | -       |
| Left                                     | 0            | 0                | 0                |         |
| <b>KPS score (preoperative)</b>          |              |                  |                  |         |
| 100                                      | 24           | 26               | 28               | 0.12    |
| 90~100                                   | 4            | 2                | 0                |         |
| <b>Education level (y)*</b>              | 13.0 ± 0.6   | 12.0 ± 0.6       | 13.4 ± 0.6       | 0.16    |
| <b>Histopathology</b>                    |              |                  |                  |         |
| Astrocytoma                              | 8            | 6                | -                |         |
| Oligodendroglioma                        | 4            | 7                | -                | 0.73    |
| Anaplastic Astrocytoma                   | 13           | 13               | -                |         |
| Anaplastic Oligodendroglioma             | 3            | 2                | -                |         |
| <b>IDH status</b>                        |              |                  |                  |         |
| Mutation                                 | 11           | 13               |                  | 0.59    |
| Wild-type                                | 17           | 15               |                  |         |
| <b>Chromosome 1p/19q status</b>          |              |                  |                  |         |
| Codeletion                               | 6            | 8                |                  | 0.53    |
| Non-codeletion                           | 22           | 20               |                  |         |
| <b>Tumor volume (mL)*</b>                | 52.38 ± 7.06 | 49.65 ± 4.98     | -                | 0.85    |
| <b>Onset age (y)*</b>                    | 41.1 ± 2.1   | -                | -                | -       |
| <b>Frequency before diagnosis</b>        |              |                  |                  |         |
| Low (only once)                          | 23           |                  |                  |         |
| Medium (2~3 times)                       | 3            |                  |                  |         |
| High (>3 times)                          | 2            |                  |                  |         |
| <b>Preoperative anti-epileptic drugs</b> |              |                  |                  |         |
| Levetiracetam (0.5g, twice a day)        | 28           |                  |                  | -       |
| <b>Postoperative epileptic control</b>   |              |                  |                  |         |
| Engel Class I                            | 28           |                  |                  | -       |

\* Values are means ± standard error of mean.

Using Mann-Whitney U test to compare the difference of Karnofsky performance status between GRE and non-GRE groups.

Using student t test via non-parametric equivalent to compare the difference of tumor volume between GRE and non-GRE groups.

Using one-way ANOVA test to compare the difference of age between patients groups and healthy group.

Using one-way ANOVA test via non-parametric equivalent to compare the difference of education level between patients groups and healthy group.

Using to Chi-square test to compare the differences of gender, tumor location, and IDH status between GRE and non-GRE groups.

KPS = Karnofsky performance status

1  
2  
3 **1 Figure legends**  
4

5 **2 Figure 1.** Results of alterations in global topological properties when gliomas grew in  
6 the right temporal lobe. The grp GRE = group of patients with glioma-related epilepsy.  
7  
8 The grp non-GRE = group of patients without glioma-related epilepsy. The grp healthy  
9 = group of healthy participants.  
10  
11  
12  
13

14 **6 Figure 2.** Results of alterations in transitivity and vulnerability when gliomas grew in  
15 the right temporal lobe. The grp GRE = group of patients with glioma-related epilepsy.  
16  
17 The grp non-GRE = group of patients without glioma-related epilepsy. The grp healthy  
18 = group of healthy participants.  
19  
20  
21  
22  
23

24 **10 Figure 3.** Results of alterations in small-worldness when gliomas grew in the right  
25 temporal lobe. The grp GRE = group of patients with glioma-related epilepsy. The grp  
26 non-GRE = group of patients without glioma-related epilepsy. The grp healthy = group  
27 of healthy participants.  
28  
29  
30  
31  
32

33 **14 Figure 4.** Results of alterations in nodal properties of right nodes in the language  
34 network when gliomas grew in the right temporal lobe. The grp GRE = group of patients  
35 with glioma-related epilepsy. The grp non-GRE = group of patients without glioma-  
36 related epilepsy. The grp healthy = group of healthy participants.  
37  
38  
39  
40  
41

42 **18 Figure 5.** Results of alterations in nodal properties of left nodes in the language network  
43 when gliomas grew in the right temporal lobe. The grp GRE = group of patients with  
44 glioma-related epilepsy. The grp non-GRE = group of patients without glioma-related  
45 epilepsy. The grp healthy = group of healthy participants.  
46  
47  
48  
49  
50  
51  
52

53  
54  
55  
56  
57  
58  
59  
60

## 1 **Supplementary materials**

### 2 **Part 1. Processing pipeline of rs-fMRI data.**

3 The rs-fMRI data were processed as follows: a) transformation to a NIFTI file, b)  
 4 removal of the first 5 time points, c) slice timing, d) realignment, e) normalization  
 5 (normalized to EPI template [1]), f) smoothing (full width half maximum = 4 mm), g)  
 6 temporal detrending (linear detrending), h) covariance regressing (white matter signal:  
 7 with WMMask\_3mm; CSF signal: with CSFMask\_3mm; head motion: Friston – 24  
 8 parameters), i) temporal filtering (0.01–0.08 Hz), and j) scrubbing (linear interpolation,  
 9 subsequent time point number = 2, FD threshold = 0.5, and previous time point number  
 10 = 1,).

### 11 **Part 2. Information of Topological Properties**

#### 12 **Clustering coefficient**

13 Cluster coefficient represents the possibility that the neighbors of node  $j$  can  
 14 interact with other nodes, and meant clustering degree of functional network. The  
 15 formula was as follows:

$$16 \quad C_i = \frac{2e_j}{k_j(k_j - 1)}$$

17  $C_j$ , cluster coefficient of node  $j$ ;  $k_j$ , the number of probable edges connecting to  
 18 other nodes;  $e_j$ , the number of actual edges connecting to other nodes.

#### 19 **Global efficiency**

20 Global efficiency meant the ability of information transmission at global level. The  
 21 formula was as follows: (reference to supplementary materials of Ji G et al, Radiology,  
 22 2017 [2]):

$$23 \quad E_{\text{glob}} = \frac{1}{N(N-1)} \sum_{i,j \in V, i \neq j} \frac{1}{l_{ij}}$$

1  $E_{glob}$ , global efficiency of whole functional network;  $N$ , the number of actual  
 2 edges connecting node  $i$  to other nodes in the whole network;  $l_{i, k}$ , the shortest path  
 3 length between the nodes  $j$  and  $k$ .

#### 4 **Shortest path length**

5 The shortest path length meant the minimum number of passing edges for  
 6 information conduction between each two nodes. It describes the optimal pathway for  
 7 information transmission at global level. The calculation formula was as follows:

$$L = \frac{1}{N(N-1)} \sum_{i,j \in V, i \neq j} l_{ij}$$

8  $L$ , shortest path length of network;  $N$ , the number of actual edges connecting the  
 9 node  $i$  to another node in the whole network;  $l_{i, k}$ , the shortest path length between the  
 10 node  $j$  and node  $k$ .

#### 11 **Local efficiency**

12 Local efficiency represents the ability of information conduction in local network.  
 13 The calculation formula as follows:

$$E(i) = \frac{1}{N_{G_i}(N_{G_i}-1)} \sum_{j \neq k \in G_i} \frac{1}{l_{j,k}}$$

14  $E_i$ , local efficiency of local network;  $N_{G_i}$ , the number of actual edges connecting  
 15 node  $i$  to other nodes in the local network;  $l_{i, k}$ , the shortest path length between the  
 16 nodes  $j$  and  $k$ .

#### 17 **Nodal efficiency**

18 Nodal efficiency represents the ability of information transmission of the node  $i$ .  
 19 The calculation formula as follows:

$$E_{nodal} = \frac{1}{(N-1)} \sum_{i,j \in V, i \neq j} \frac{1}{l_{ij}}$$

1  $E_{nodal}$  nodal efficiency of whole functional network;  $N$ , the number of actual edges  
2 connecting node  $i$  to other nodes in the whole functional network;  $l_i, k$ , the shortest path  
3 length between the nodes  $j$  and  $k$ .

#### 4 **Small-worldness properties**

5 Small-worldness properties (gamma, lambda, and sigma) mean the efficiency of  
6 information transmission. Gamma ( $\gamma$ ) =  $C_{real}/C_{random} \gg 1$  ( $C$  = cluster coefficient).  
7 Lambda ( $\lambda$ ) =  $L_{real}/L_{random} \sim 1$  ( $L$  = shortest path length). And Sigma ( $\sigma$ ) =  $\gamma/\lambda > 1$ . [3,  
8 4] If a network has a high value of sigma, the ability of information transmission will  
9 be strong.

10

11

1 **Part 3. Supplemental Tables**

2 **Table S1. Montreal Neurological Institute (MNI) locations of 22 nodes in the**  
 3 **language network**

| Regions of interesting | Modified Cyto-architectonic              | Left hemisphere |     |     | Right hemisphere |     |    |
|------------------------|------------------------------------------|-----------------|-----|-----|------------------|-----|----|
|                        |                                          | X               | Y   | Z   | X                | Y   | Z  |
| A45c_L(R)              | caudal BA 45                             | -53             | 23  | 11  | 54               | 24  | 12 |
| A45r_L(R)              | rostral BA 45                            | -49             | 36  | -3  | 51               | 36  | -1 |
| A44op_L(R)             | opercula BA 44                           | -39             | 23  | 4   | 42               | 22  | 3  |
| A44v_L(R)              | ventral BA 44                            | -52             | 13  | 6   | 54               | 14  | 11 |
| A12/47l_L(R)           | lateral BA 12/47                         | -41             | 32  | -9  | 42               | 31  | -9 |
| A4hf_L                 | Area BA 4(head and face region)          | -8              | -38 | 58  | -                | -   | -  |
| A41/42_L               | Area BA 41/42                            | -54             | -32 | 12  | -                | -   | -  |
| A22c_L                 | caudal BA 22                             | -62             | -33 | 7   | -                | -   | -  |
| A22r_L                 | rostral BA 22                            | -55             | -3  | -10 | -                | -   | -  |
| A21c_L                 | caudal BA 21                             | -65             | -30 | -12 | -                | -   | -  |
| aSTS_L                 | anterior superior temporal sulcus        | -58             | -20 | -9  | -                | -   | -  |
| rpSTS_L                | rostroposterior superior temporal sulcus | -54             | -40 | 4   | -                | -   | -  |
| cpSTS_L                | caudoposterior superior temporal sulcus  | -52             | -50 | 11  | -                | -   | -  |
| A40c_L(R)              | caudal area 40(PFm)                      | -56             | -49 | 38  | 57               | -44 | 38 |
| A39rv_L(R)             | rostroventral area 39(PGa)               | -47             | -65 | 26  | 53               | -54 | 25 |

4 \*BA = Brodmann area.

5

6

7



1 **Table S2. Montreal Neurological Institute (MNI) locations of 22 nodes in the visual**  
 2 **network.**

| Regions of interesting | Modified Cyto-architectonic            | Left hemisphere |     |     | Right hemisphere |     |     |
|------------------------|----------------------------------------|-----------------|-----|-----|------------------|-----|-----|
|                        |                                        | X               | Y   | Z   | X                | Y   | Z   |
| cLinG_L(R)             | caudal lingual gyrus                   | -11             | -82 | -11 | 10               | -85 | -9  |
| rCunG_L(R)             | rostral cuneus gyrus                   | -5              | -81 | 10  | 7                | -76 | 11  |
| cCunG_L(R)             | caudal cuneus gyrus                    | -6              | 94  | 1   | 8                | -90 | 12  |
| rLinG_L(R)             | rostral lingual gyrus                  | -17             | -60 | -6  | 18               | -60 | -7  |
| vmPOS_L(R)             | ventromedial parietal occipital sulcus | -13             | -68 | 12  | 15               | -63 | 12  |
| mOccG_L(R)             | middle occipital gyrus                 | -31             | -89 | 11  | 34               | -86 | 11  |
| V5/MT+_L(R)            | area V5/MT+                            | -46             | -74 | 3   | 48               | -70 | -1  |
| OPC_L(R)               | occipital polar cortex                 | -18             | -99 | 2   | 22               | -97 | 4   |
| iOccG_L(R)             | inferior occipital gyrus               | -30             | -88 | -12 | 32               | -85 | -12 |
| msOccG_L(R)            | medial superior occipital gyrus        | -11             | -88 | 31  | 16               | -85 | 34  |
| lsOccG_L(R)            | lateral superior occipital gyrus       | -22             | -77 | 36  | 29               | -75 | 36  |

3 \*BA = Brodmann area.

4

1 **Table S3. Montreal Neurological Institute (MNI) locations of 20 nodes in the left**  
 2 **executive control network.**

| Regions of interesting | Modified Cyto-architectonic      | Left hemisphere |     |     |
|------------------------|----------------------------------|-----------------|-----|-----|
|                        |                                  | X               | Y   | Z   |
| A8dl_L                 | dorsolateral area BA 8           | -18             | 24  | 53  |
| A9m_L                  | medial area BA 9                 | -5              | 36  | 38  |
| A9/46d_L               | dorsal area BA 9/46              | -27             | 43  | 31  |
| IFJ_L                  | inferior frontal junction        | -42             | 13  | 36  |
| A46_L                  | area BA 46                       | -28             | 56  | 12  |
| A9/46v_L               | ventral area BA 9/46             | -41             | 41  | 16  |
| A8vl_L                 | ventrolateral area BA 8          | -33             | 23  | 45  |
| A6vl_L                 | ventrolateral area BA 6          | -32             | 4   | 55  |
| A10l_L                 | ventrolateral area BA 10         | -26             | 60  | -6  |
| IFS_L                  | inferior frontal sulcus          | -47             | 32  | 14  |
| A45r_L                 | rostral area BA 45               | 49              | 36  | -3  |
| A12/47l_L              | lateral area BA 12/47            | -41             | 32  | -9  |
| A21c_L                 | caudal area BA 21                | -65             | -30 | -12 |
| A37vl_L                | ventrolateral area BA 37         | -55             | -60 | -6  |
| A20cl_L                | caudal-lateral of area BA 20     | -59             | -42 | -16 |
| A7ip_L                 | intraparietal area BA 7 (hIP3)   | -27             | -59 | 54  |
| A39c_L                 | caudal area 39 (PGp)             | -34             | -80 | 29  |
| A39rd_L                | rostral dorsal area BA 39 (Hip3) | -38             | -61 | 46  |
| A40c_L                 | caudal area BA 40 (PFm)          | -56             | -49 | 38  |
| A39rv_L                | rostroventral area BA 39 (PGa)   | -47             | -65 | 26  |

3 \*BA = Brodmann area.  
 4

1 **Table S4. Montreal Neurological Institute (MNI) locations of 22 nodes in the**  
 2 **sensorimotor network**

| Regions of interesting | Modified Cyto-architectonic         | Left hemisphere |     |    | Right hemisphere |     |    |
|------------------------|-------------------------------------|-----------------|-----|----|------------------|-----|----|
|                        |                                     | X               | Y   | Z  | X                | Y   | Z  |
| A6m_L(R)               | Medial area BA 6                    | 5               | 36  | 38 | 6                | 38  | 35 |
| A4hf_L(R)              | Area BA 4 (head and face)           | -49             | -8  | 39 | 55               | -2  | 33 |
| A4ul_L(R)              | Area BA 4 (upper limb)              | -26             | -25 | 63 | 34               | -19 | 59 |
| A4t_L(R)               | Area BA 4 (trunk)                   | -13             | -20 | 73 | 15               | -22 | 71 |
| A4tl_L(R)              | Area BA 4 (tongue and larynx)       | -52             | 0   | 8  | 54               | 4   | 9  |
| A1_2_3ll_L(R)          | Area BA 1/2/3 (lower limb)          | -8              | -38 | 58 | 10               | -34 | 54 |
| A4ll_L(R)              | Area BA 4 (lower limb)              | -4              | -23 | 61 | 5                | -21 | 61 |
| A1_2_3ulhf_L(R)        | Area BA 1/2/3 (upper limb and face) | -50             | -16 | 43 | 50               | -14 | 44 |
| A1_2_3tonIa_L(R)       | Area BA 1/2/3 (tongue and larynx)   | -56             | -14 | 16 | 56               | -10 | 15 |
| A2_L(R)                | Area BA 2                           | -46             | -30 | 50 | 48               | -24 | 48 |
| A1_2_3tru_L(R)         | Area BA 1/2/3 (trunk)               | -21             | -35 | 68 | 20               | -33 | 69 |

3 \*BA = Brodmann area.

4

**Table S5. Global Topological properties compared between the patient and healthy groups**

|                        | GRE group     | non-GRE group | Health group  | One-way ANOVA (p value) | GRE vs non-GRE (p value) | GRE vs Health (p value) | non-GRE vs n Health (p value) |
|------------------------|---------------|---------------|---------------|-------------------------|--------------------------|-------------------------|-------------------------------|
| Global efficiency      | 0.522 ± 0.003 | 0.502 ± 0.005 | 0.525 ± 0.002 | < 0.0001                | < 0.0001                 | 0.5939                  | < 0.0001                      |
| Local efficiency       | 0.430 ± 0.010 | 0.465 ± 0.012 | 0.437 ± 0.010 | 0.0045                  | 0.0016                   | 0.4157                  | 0.0165                        |
| Shortest path length   | 2.023 ± 0.008 | 2.089 ± 0.015 | 2.015 ± 0.006 | < 0.0001                | < 0.0001                 | 0.6025                  | < 0.0001                      |
| Clustering coefficient | 0.325 ± 0.010 | 0.577 ± 0.002 | 0.334 ± 0.009 | 0.0070                  | 0.0020                   | 0.9079                  | 0.0348                        |
| Gamma                  | 1.241 ± 0.035 | 1.289 ± 0.034 | 1.278 ± 0.030 | 0.4822                  | -                        | -                       | -                             |
| Lambda                 | 1.016 ± 0.003 | 1.043 ± 0.006 | 1.014 ± 0.002 | < 0.0001                | < 0.0001                 | 0.5969                  | < 0.0001                      |
| Sigma                  | 1.221 ± 0.033 | 1.232 ± 0.032 | 1.259 ± 0.029 | 0.5176                  | -                        | -                       | -                             |
| Transitivity           | 0.316 ± 0.009 | 0.372 ± 0.015 | 0.315 ± 0.007 | 0.0002                  | 0.0011                   | 0.9524                  | 0.0009                        |
| Vulnerability          | 0.060 ± 0.003 | 0.071 ± 0.005 | 0.060 ± 0.003 | 0.0499                  | 0.0371                   | 0.9999                  | 0.0371                        |

\* The global properties were calculated with one-way ANOVA test. If the results one-way ANOVA were significance, post-hoc analysis with least significant difference was subsequently applied.

**Table S6. Nodal efficiency compared between the patients and healthy groups**

| Node name | GRE group     | non-GRE group | Health group  | One-way ANOVA (p value) | GRE vs non-GRE (p value) | GRE vs Health (p value) | non-GRE vs n Health (p value) |
|-----------|---------------|---------------|---------------|-------------------------|--------------------------|-------------------------|-------------------------------|
| A45c_L    | 0.543 ± 0.013 | 0.497 ± 0.024 | 0.535 ± 0.012 | 0.1396                  | -                        | -                       | -                             |
| A45c_R    | 0.518 ± 0.015 | 0.462 ± 0.025 | 0.535 ± 0.014 | 0.0180                  | -                        | -                       | -                             |
| A45r_L    | 0.540 ± 0.015 | 0.506 ± 0.017 | 0.517 ± 0.016 | 0.3018                  | -                        | -                       | -                             |
| A45r_R    | 0.520 ± 0.008 | 0.467 ± 0.017 | 0.523 ± 0.013 | 0.0060                  | 0.0207                   | 0.8693                  | 0.0129                        |
| A44op_L   | 0.505 ± 0.013 | 0.502 ± 0.016 | 0.502 ± 0.022 | 0.9891                  | -                        | -                       | -                             |
| A44op_R   | 0.525 ± 0.019 | 0.477 ± 0.026 | 0.482 ± 0.018 | 0.2202                  | -                        | -                       | -                             |
| A44v_L    | 0.540 ± 0.010 | 0.560 ± 0.014 | 0.522 ± 0.010 | 0.0677                  | -                        | -                       | -                             |
| A44v_R    | 0.497 ± 0.014 | 0.510 ± 0.020 | 0.510 ± 0.022 | 0.8612                  | -                        | -                       | -                             |
| A12/47l_L | 0.533 ± 0.013 | 0.480 ± 0.029 | 0.508 ± 0.017 | 0.1941                  | -                        | -                       | -                             |
| A12/47l_R | 0.517 ± 0.014 | 0.512 ± 0.012 | 0.511 ± 0.016 | 0.9520                  | -                        | -                       | -                             |
| A4hf_L    | 0.480 ± 0.018 | 0.575 ± 0.015 | 0.474 ± 0.020 | 0.1507                  | -                        | -                       | -                             |
| A41/42_L  | 0.514 ± 0.017 | 0.503 ± 0.015 | 0.541 ± 0.016 | 0.2208                  | -                        | -                       | -                             |
| A22c_L    | 0.522 ± 0.012 | 0.508 ± 0.013 | 0.513 ± 0.016 | 0.7776                  | -                        | -                       | -                             |
| A22r_L    | 0.496 ± 0.024 | 0.497 ± 0.020 | 0.540 ± 0.010 | 0.1700                  | -                        | -                       | -                             |
| A21c_L    | 0.532 ± 0.015 | 0.529 ± 0.016 | 0.535 ± 0.012 | 0.9579                  | -                        | -                       | -                             |
| aSTS_L    | 0.515 ± 0.016 | 0.508 ± 0.020 | 0.540 ± 0.015 | 0.3948                  | -                        | -                       | -                             |
| rpSTS_L   | 0.546 ± 0.014 | 0.528 ± 0.020 | 0.538 ± 0.012 | 0.7284                  | -                        | -                       | -                             |

1  
2  
3  
4  
5  
6  
7  
8  
9  
10  
11  
12  
13  
14  
15  
16  
17  
18  
19  
20  
21  
22  
23  
24  
25  
26  
27  
28  
29  
30  
31  
32  
33  
34  
35  
36  
37  
38  
39  
40  
41  
42  
43  
44  
45  
46

|         |               |               |               |        |        |        |        |
|---------|---------------|---------------|---------------|--------|--------|--------|--------|
| cpSTS_L | 0.490 ± 0.022 | 0.513 ± 0.024 | 0.522 ± 0.017 | 0.5430 | -      | -      | -      |
| A40c_L  | 0.538 ± 0.015 | 0.529 ± 0.021 | 0.562 ± 0.011 | 0.3294 | -      | -      | -      |
| A40c_R  | 0.512 ± 0.024 | 0.493 ± 0.022 | 0.540 ± 0.014 | 0.2683 | -      | -      | -      |
| A39rv_L | 0.547 ± 0.014 | 0.541 ± 0.016 | 0.534 ± 0.016 | 0.8350 | -      | -      | -      |
| A39rv_R | 0.558 ± 0.012 | 0.483 ± 0.019 | 0.560 ± 0.012 | 0.0002 | 0.0014 | 0.8903 | 0.0010 |

\* The global properties were calculated with one-way ANOVA test. If the results one-way ANOVA were significance, post-hoc analysis with least significant difference was subsequently applied.

**Table S7. Nodal local efficiency compared between the patients and healthy groups**

| Node name | GRE group     | non-GRE group | Health group  | One-way ANOVA (p value) | GRE vs non-GRE (p value) | GRE vs Health (p value) | non-GRE vs n Health (p value) |
|-----------|---------------|---------------|---------------|-------------------------|--------------------------|-------------------------|-------------------------------|
| A45c_L    | 0.331 ± 0.041 | 0.381 ± 0.050 | 0.348 ± 0.051 | 0.7486                  | -                        | -                       | -                             |
| A45c_R    | 0.371 ± 0.046 | 0.340 ± 0.052 | 0.340 ± 0.052 | 0.7904                  | -                        | -                       | -                             |
| A45r_L    | 0.373 ± 0.041 | 0.506 ± 0.051 | 0.376 ± 0.048 | 0.0783                  | -                        | -                       | -                             |
| A45r_R    | 0.312 ± 0.038 | 0.366 ± 0.052 | 0.347 ± 0.050 | 0.7096                  | -                        | -                       | -                             |
| A44op_L   | 0.365 ± 0.045 | 0.418 ± 0.052 | 0.269 ± 0.031 | 0.0567                  | -                        | -                       | -                             |
| A44op_R   | 0.307 ± 0.033 | 0.359 ± 0.040 | 0.303 ± 0.052 | 0.5839                  | -                        | -                       | -                             |
| A44v_L    | 0.344 ± 0.039 | 0.478 ± 0.045 | 0.328 ± 0.045 | 0.3179                  | -                        | -                       | -                             |
| A44v_R    | 0.285 ± 0.037 | 0.383 ± 0.053 | 0.347 ± 0.037 | 0.2717                  | -                        | -                       | -                             |
| A12/47l_L | 0.336 ± 0.044 | 0.293 ± 0.045 | 0.322 ± 0.046 | 0.7864                  | -                        | -                       | -                             |
| A12/47l_R | 0.364 ± 0.038 | 0.387 ± 0.048 | 0.370 ± 0.044 | 0.9277                  | -                        | -                       | -                             |
| A4hf_L    | 0.249 ± 0.032 | 0.334 ± 0.057 | 0.392 ± 0.045 | 0.0884                  | -                        | -                       | -                             |
| A41/42_L  | 0.437 ± 0.047 | 0.353 ± 0.040 | 0.307 ± 0.031 | 0.0696                  | -                        | -                       | -                             |
| A22c_L    | 0.370 ± 0.038 | 0.359 ± 0.049 | 0.333 ± 0.038 | 0.8174                  | -                        | -                       | -                             |
| A22r_L    | 0.302 ± 0.047 | 0.478 ± 0.053 | 0.321 ± 0.037 | 0.1554                  | -                        | -                       | -                             |

|         |               |               |               |        |        |        |        |
|---------|---------------|---------------|---------------|--------|--------|--------|--------|
| A21c_L  | 0.325 ± 0.036 | 0.430 ± 0.042 | 0.389 ± 0.037 | 0.1531 | -      | -      | -      |
| aSTS_L  | 0.341 ± 0.044 | 0.384 ± 0.051 | 0.351 ± 0.043 | 0.7921 | -      | -      | -      |
| rpSTS_L | 0.392 ± 0.043 | 0.416 ± 0.047 | 0.375 ± 0.042 | 0.8049 | -      | -      | -      |
| cpSTS_L | 0.345 ± 0.054 | 0.381 ± 0.048 | 0.364 ± 0.045 | 0.8749 | -      | -      | -      |
| A40c_L  | 0.301 ± 0.032 | 0.455 ± 0.039 | 0.437 ± 0.037 | 0.0061 | 0.0102 | 0.0280 | 0.7239 |
| A40c_R  | 0.350 ± 0.044 | 0.344 ± 0.043 | 0.400 ± 0.042 | 0.6034 | -      | -      | -      |
| A39rv_L | 0.346 ± 0.041 | 0.464 ± 0.043 | 0.383 ± 0.046 | 0.1475 | -      | -      | -      |
| A39rv_R | 0.428 ± 0.046 | 0.449 ± 0.052 | 0.426 ± 0.038 | 0.9242 | -      | -      | -      |

\* The global properties were calculated with one-way ANOVA test. If the results one-way ANOVA were significance, post-hoc analysis with least significant difference was subsequently applied.



**Table S8. Degree centrality compared between the patients and healthy groups**

| Node name | GRE group     | non-GRE group | Health group  | One-way ANOVA (p value) | GRE vs non-GRE (p value) | GRE vs Health (p value) | non-GRE vs n Health (p value) |
|-----------|---------------|---------------|---------------|-------------------------|--------------------------|-------------------------|-------------------------------|
| A45c_L    | 4.752 ± 0.331 | 4.375 ± 0.460 | 4.470 ± 0.308 | 0.7587                  | -                        | -                       | -                             |
| A45c_R    | 4.222 ± 0.350 | 3.687 ± 0.349 | 4.548 ± 0.328 | 0.2059                  | -                        | -                       | -                             |
| A45r_L    | 4.704 ± 0.388 | 4.518 ± 0.347 | 4.226 ± 0.347 | 0.6452                  | -                        | -                       | -                             |
| A45r_R    | 4.081 ± 0.190 | 3.538 ± 0.332 | 4.262 ± 0.301 | 0.1721                  | -                        | -                       | -                             |
| A44op_L   | 3.937 ± 0.284 | 4.355 ± 0.341 | 4.185 ± 0.369 | 0.6724                  | -                        | -                       | -                             |
| A44op_R   | 4.552 ± 0.378 | 4.117 ± 0.405 | 3.510 ± 0.312 | 0.1376                  | -                        | -                       | -                             |
| A44v_L    | 4.750 ± 0.250 | 5.821 ± 0.349 | 4.071 ± 0.262 | 0.0007                  | 0.0282                   | 0.6218                  | 0.0005                        |
| A44v_R    | 3.885 ± 0.244 | 4.560 ± 0.433 | 4.339 ± 0.356 | 0.3910                  | -                        | -                       | -                             |
| A12/47l_L | 4.498 ± 0.314 | 4.206 ± 0.450 | 4.046 ± 0.294 | 0.6672                  | -                        | -                       | -                             |
| A12/47l_R | 4.228 ± 0.322 | 4.419 ± 0.321 | 4.121 ± 0.353 | 0.8146                  | -                        | -                       | -                             |
| A4hf_L    | 3.615 ± 0.295 | 3.244 ± 0.356 | 3.425 ± 0.283 | 0.7046                  | -                        | -                       | -                             |
| A41/42_L  | 4.262 ± 0.362 | 4.115 ± 0.316 | 4.776 ± 0.361 | 0.3721                  | -                        | -                       | -                             |
| A22c_L    | 4.304 ± 0.303 | 4.298 ± 0.336 | 4.123 ± 0.375 | 0.9129                  | -                        | -                       | -                             |
| A22r_L    | 4.190 ± 0.401 | 4.179 ± 0.404 | 4.556 ± 0.266 | 0.7063                  | -                        | -                       | -                             |
| A21c_L    | 4.510 ± 0.287 | 4.843 ± 0.390 | 4.526 ± 0.327 | 0.7339                  | -                        | -                       | -                             |
| aSTS_L    | 4.298 ± 0.306 | 4.464 ± 0.390 | 4.776 ± 0.363 | 0.6284                  | -                        | -                       | -                             |
| rpSTS_L   | 5.020 ± 0.317 | 4.952 ± 0.362 | 4.722 ± 0.279 | 0.7899                  | -                        | -                       | -                             |
| cpSTS_L   | 3.766 ± 0.349 | 4.728 ± 0.399 | 4.417 ± 0.347 | 0.1715                  | -                        | -                       | -                             |
| A40c_L    | 4.792 ± 0.340 | 5.014 ± 0.440 | 5.208 ± 0.311 | 0.7262                  | -                        | -                       | -                             |

1  
2  
3  
4  
5  
6  
7  
8  
9  
10  
11  
12  
13  
14  
15  
16  
17  
18  
19  
20  
21  
22  
23  
24  
25  
26  
27  
28  
29  
30  
31  
32  
33  
34  
35  
36  
37  
38  
39  
40  
41  
42  
43  
44  
45  
46

|         |                  |               |                  |        |   |   |   |
|---------|------------------|---------------|------------------|--------|---|---|---|
| A40c_R  | 4.397 ±<br>0.400 | 4.397 ± 0.404 | 4.702 ±<br>0.333 | 0.8068 | - | - | - |
| A39rv_L | 5.012 ±<br>0.372 | 5.125 ± 0.338 | 4.540 ±<br>0.368 | 0.4776 | - | - | - |
| A39rv_R | 5.125 ±<br>0.339 | 3.948 ± 0.375 | 5.190 ±<br>0.292 | 0.1654 | - | - | - |

\* The global properties were calculated with one-way ANOVA test. If the results one-way ANOVA were significance, post-hoc analysis with least significant difference was subsequently applied.

**Table S9. Nodal clustering coefficient compared between the patients and healthy groups**

| Node name | GRE group     | non-GRE group | Health group  | One-way ANOVA (p value) | GRE vs non-GRE (p value) | GRE vs Health (p value) | non-GRE vs n Health (p value) |
|-----------|---------------|---------------|---------------|-------------------------|--------------------------|-------------------------|-------------------------------|
| A45c_L    | 0.241 ± 0.031 | 0.290 ± 0.040 | 0.281 ± 0.043 | 0.6274                  | -                        | -                       | -                             |
| A45c_R    | 0.286 ± 0.040 | 0.284 ± 0.045 | 0.304 ± 0.033 | 0.9248                  | -                        | -                       | -                             |
| A45r_L    | 0.285 ± 0.032 | 0.412 ± 0.044 | 0.321 ± 0.046 | 0.0835                  | -                        | -                       | -                             |
| A45r_R    | 0.259 ± 0.032 | 0.316 ± 0.046 | 0.298 ± 0.044 | 0.6047                  | -                        | -                       | -                             |
| A44op_L   | 0.296 ± 0.039 | 0.323 ± 0.041 | 0.217 ± 0.025 | 0.0966                  | -                        | -                       | -                             |
| A44op_R   | 0.235 ± 0.025 | 0.283 ± 0.031 | 0.256 ± 0.049 | 0.6596                  | -                        | -                       | -                             |
| A44v_L    | 0.270 ± 0.032 | 0.355 ± 0.035 | 0.260 ± 0.039 | 0.1201                  | -                        | -                       | -                             |
| A44v_R    | 0.234 ± 0.029 | 0.301 ± 0.044 | 0.271 ± 0.029 | 0.3956                  | -                        | -                       | -                             |
| A12/47l_L | 0.265 ± 0.037 | 0.223 ± 0.036 | 0.257 ± 0.038 | 0.6991                  | -                        | -                       | -                             |
| A12/47l_R | 0.291 ± 0.032 | 0.316 ± 0.036 | 0.298 ± 0.038 | 0.8819                  | -                        | -                       | -                             |
| A4hf_L    | 0.201 ± 0.025 | 0.276 ± 0.047 | 0.329 ± 0.040 | 0.0641                  | -                        | -                       | -                             |
| A41/42_L  | 0.361 ± 0.044 | 0.286 ± 0.032 | 0.228 ± 0.021 | 0.2485                  | -                        | -                       | -                             |
| A22c_L    | 0.298 ± 0.032 | 0.286 ± 0.039 | 0.271 ± 0.033 | 0.8558                  | -                        | -                       | -                             |
| A22r_L    | 0.229 ± 0.037 | 0.386 ± 0.048 | 0.250 ± 0.027 | 0.0097                  | 0.0150                   | 0.7002                  | 0.0433                        |
| A21c_L    | 0.255 ± 0.026 | 0.326 ± 0.034 | 0.296 ± 0.027 | 0.2389                  | -                        | -                       | -                             |

1  
2  
3  
4  
5  
6  
7  
8  
9  
10  
11  
12  
13  
14  
15  
16  
17  
18  
19  
20  
21  
22  
23  
24  
25  
26  
27  
28  
29  
30  
31  
32  
33  
34  
35  
36  
37  
38  
39  
40  
41  
42  
43  
44  
45  
46

|         |               |               |               |        |   |   |   |
|---------|---------------|---------------|---------------|--------|---|---|---|
| aSTS_L  | 0.274 ± 0.036 | 0.307 ± 0.042 | 0.282 ± 0.040 | 0.8213 | - | - | - |
| rpSTS_L | 0.289 ± 0.034 | 0.326 ± 0.042 | 0.284 ± 0.038 | 0.7019 | - | - | - |
| cpSTS_L | 0.274 ± 0.047 | 0.291 ± 0.038 | 0.291 ± 0.037 | 0.9449 | - | - | - |
| A40c_L  | 0.235 ± 0.025 | 0.348 ± 0.032 | 0.317 ± 0.031 | 0.2252 | - | - | - |
| A40c_R  | 0.273 ± 0.036 | 0.282 ± 0.037 | 0.309 ± 0.037 | 0.7685 | - | - | - |
| A39rv_L | 0.250 ± 0.032 | 0.358 ± 0.035 | 0.312 ± 0.042 | 0.1168 | - | - | - |
| A39rv_R | 0.314 ± 0.035 | 0.371 ± 0.046 | 0.316 ± 0.029 | 0.4788 | - | - | - |

\* The global properties were calculated with one-way ANOVA test. If the results one-way ANOVA were significance, post-hoc analysis with least significant difference was subsequently applied.

## Reference

1. Calhoun VD, Wager TD, Krishnan A, et al. The impact of T1 versus EPI spatial normalization templates for fMRI data analyses. *Hum Brain Mapp* 2017;38:5331-5342
2. Ji GJ, Yu Y, Miao HH, et al. Decreased Network Efficiency in Benign Epilepsy with Centrotemporal Spikes. *Radiology* 2017;283:186-194
3. Humphries MD, Gurney K, Prescott TJ. The brainstem reticular formation is a small-world, not scale-free, network. *Proc Biol Sci* 2006;273:503-511
4. Gong Y, Wu H, Li J, et al. Multi-Granularity Whole-Brain Segmentation Based Functional Network Analysis Using Resting-State fMRI. *Front Neurosci* 2018;12:942

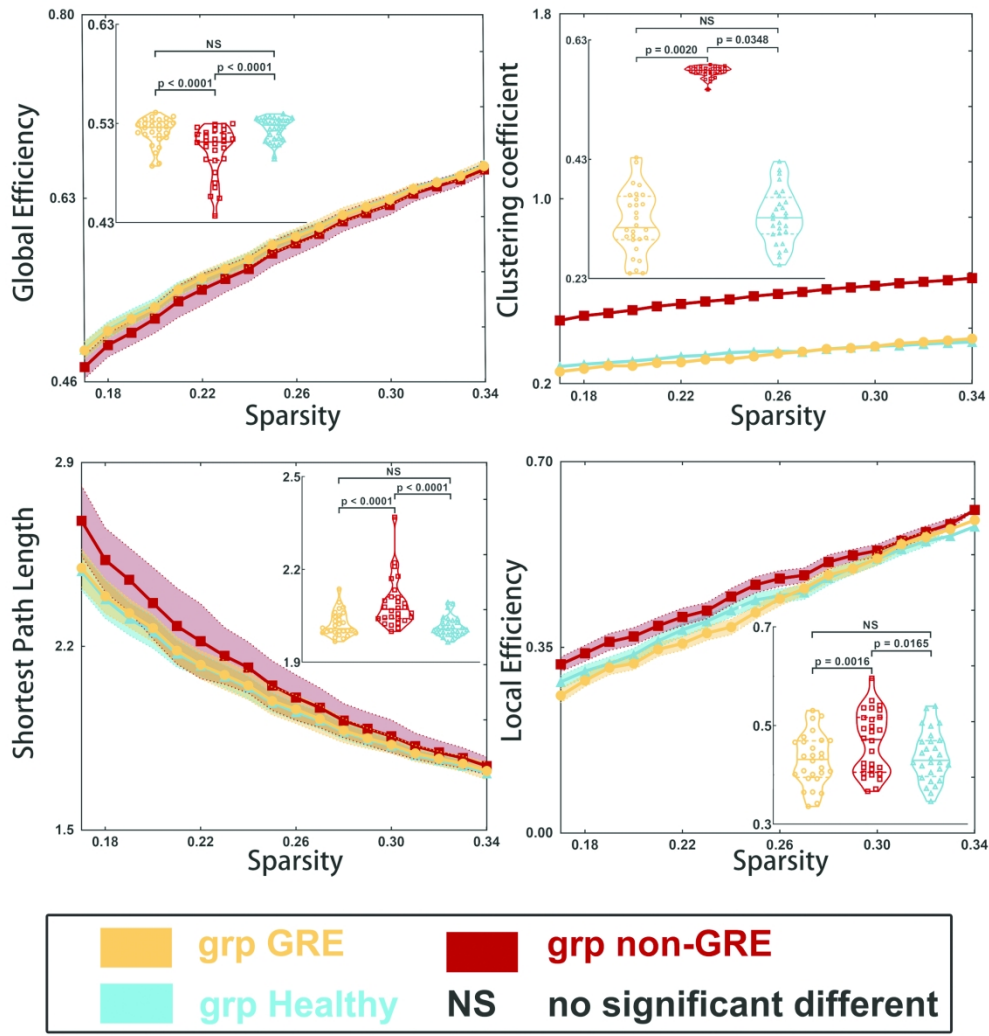

Figure 1. Results of alterations in global topological properties when gliomas grew in the right temporal lobe. The grp GRE = group of patients with glioma-related epilepsy. The grp non-GRE = group of patients without glioma-related epilepsy. The grp healthy = group of healthy participants.

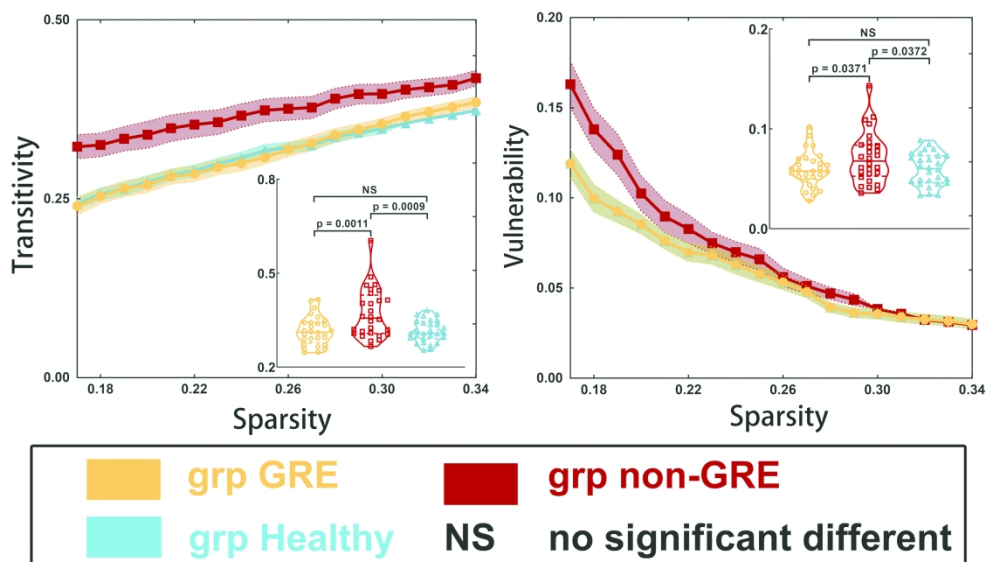

Figure 2. Results of alterations in transitivity and vulnerability when gliomas grew in the right temporal lobe. The grp GRE = group of patients with glioma-related epilepsy. The grp non-GRE = group of patients without glioma-related epilepsy. The grp healthy = group of healthy participants.

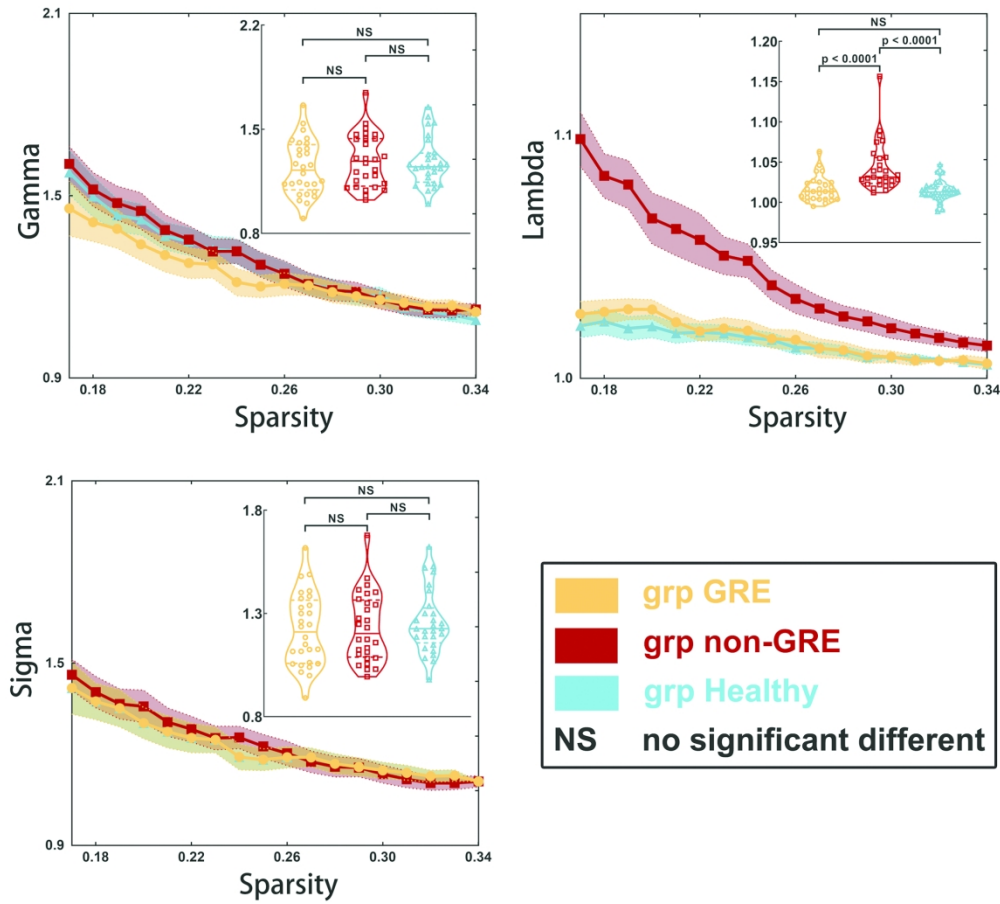

Figure 3. Results of alterations in small-worldness when gliomas grew in the right temporal lobe. The grp GRE = group of patients with glioma-related epilepsy. The grp non-GRE = group of patients without glioma-related epilepsy. The grp healthy = group of healthy participants.



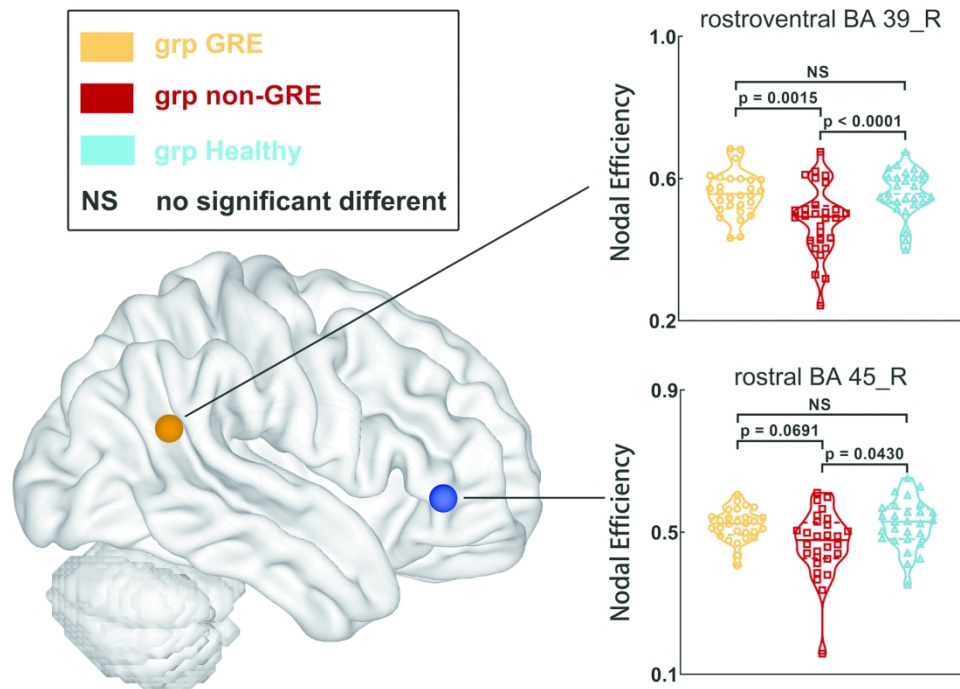

Figure 4. Results of alterations in nodal properties of right nodes in the language network when gliomas grew in the right temporal lobe. The grp GRE = group of patients with glioma-related epilepsy. The grp non-GRE = group of patients without glioma-related epilepsy. The grp healthy = group of healthy participants.

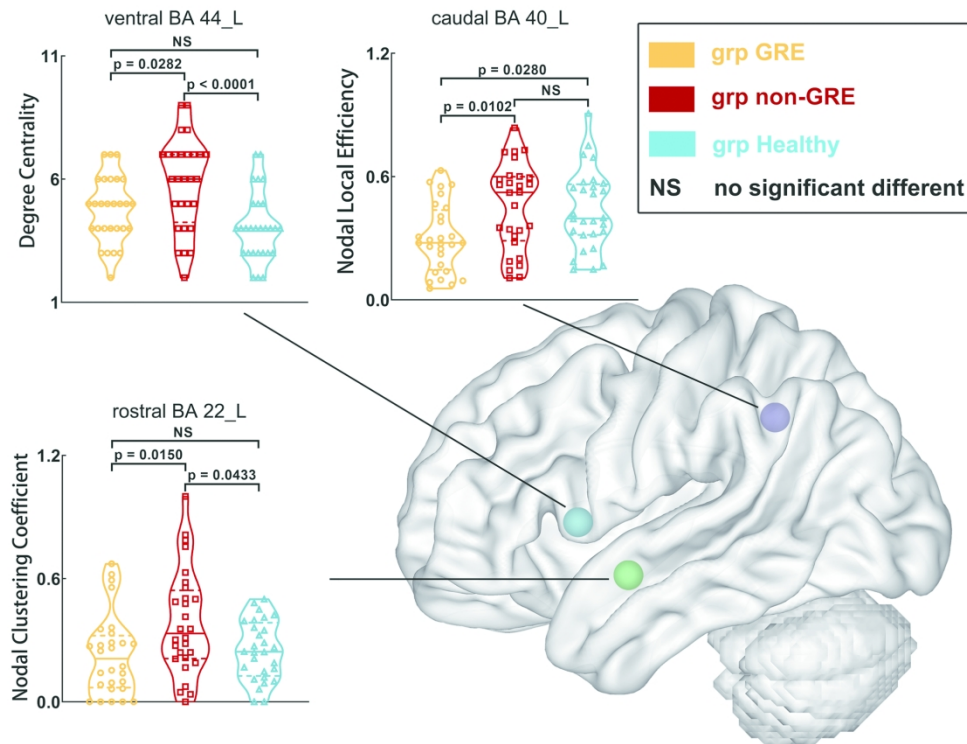

Figure 5. Results of alterations in nodal properties of left nodes in the language network when gliomas grew in the right temporal lobe. The grp GRE = group of patients with glioma-related epilepsy. The grp non-GRE = group of patients without glioma-related epilepsy. The grp healthy = group of healthy participants.
